# Supplementary material for: New Potentials for Subatomic Particles to Simulate Stable Atom and Particle-Wave Nature Attosecond Simulations
Source: Preprints.org preprint supplement (doi:10.20944/preprints202311.1107.v1), 2023-11-16
Supplement: Supplementary file 1 [file supplementary]

Supplemental Material

New Potentials for Subatomic Particles to  
Simulate Stable Atom and Particle-Wave  
Nature Attosecond Simulations

V Shanmuga Sundaram\*

*Tirupati, India*

E-mail: shanmugam138@iitbombay.org

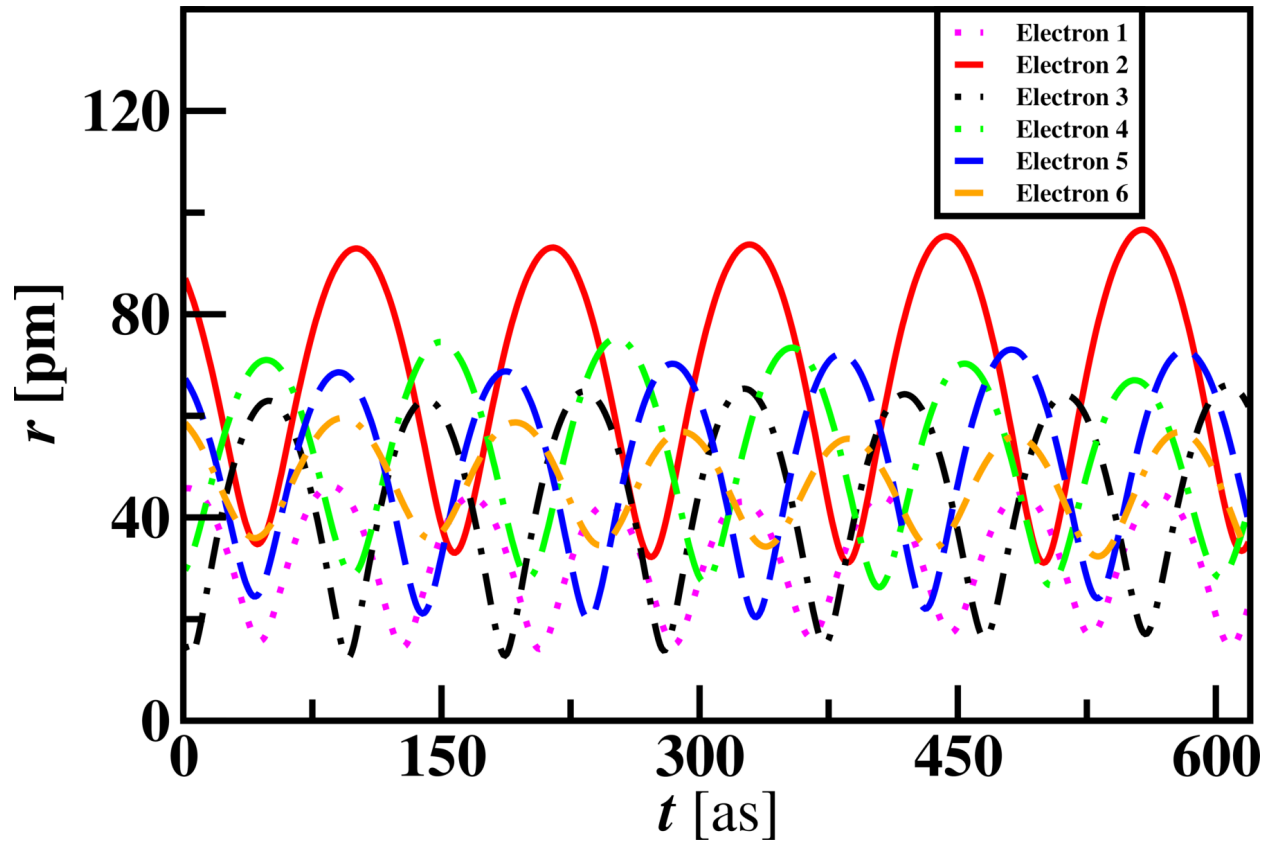

Figure S1: Distance between electrons and nucleus in a Carbon atom with time.

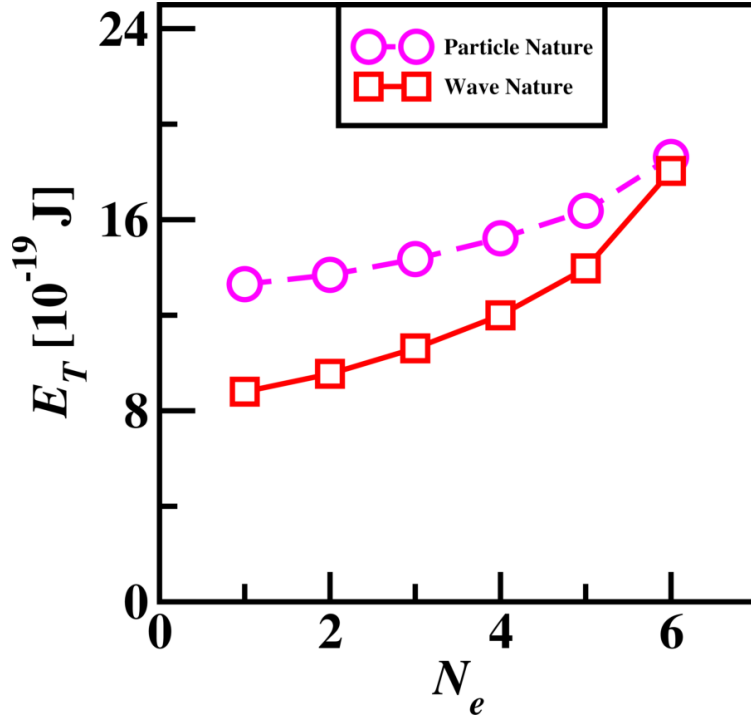

Figure S2: Total energy of electrons for particle nature and wave nature of Carbon atom for six electrons (Core electron numbered 1 and valence electron numbered 6 on the x-axis).

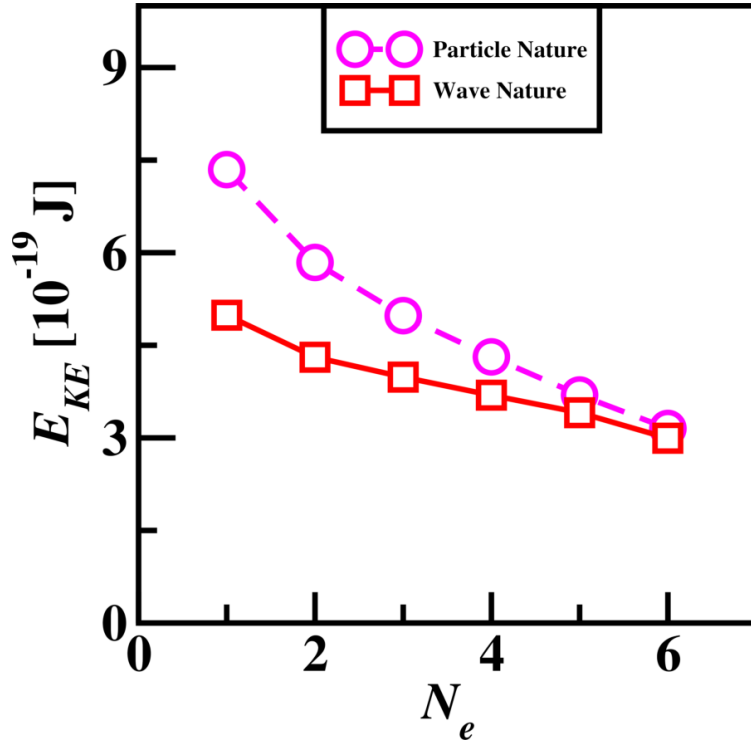

Figure S3: Kinetic energy of electrons for particle nature and wave nature of Carbon atom for six electrons (Core electron numbered 1 and valence electron numbered 6 on the x-axis).

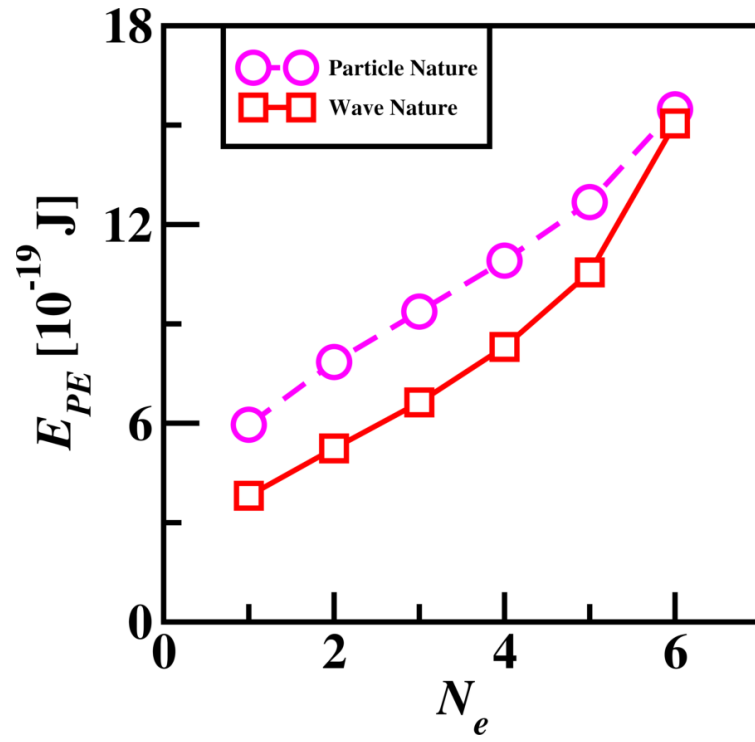

Figure S4: Potential energy of electron for particle nature and wave nature of Carbon atom for six electrons (Core electron numbered 1 and valence electron numbered 6 on the x-axis).
